# Supplementary material
Source: publisher figshare collection journal article supplement (https://acs.figshare.com/ndownloader/files/4335820)
Supplement: Supplementary file 1 [file 4335820]

 
data_shelxl 
 
_audit_creation_method            SHELXL-97 
_chemical_name_systematic 
; 
'(R)-5-(N-tert-Butoxycarbonyl)-[(S)-(2-methoxyphenylamino)-
(phenyl)methyl]-1H-pirrol-2(5H)one' 
; 
_chemical_name_common             ? 
_chemical_melting_point           ? 
_chemical_formula_moiety          ? 
_chemical_formula_sum 
 'C23 H26 N2 O4' 
_chemical_formula_weight          394.46 
 
loop_ 
 _atom_type_symbol 
 _atom_type_description 
 _atom_type_scat_dispersion_real 
 _atom_type_scat_dispersion_imag 
 _atom_type_scat_source 
 'C'  'C'   0.0033   0.0016 
 'International Tables Vol C Tables 4.2.6.8 and 6.1.1.4' 
 'H'  'H'   0.0000   0.0000 
 'International Tables Vol C Tables 4.2.6.8 and 6.1.1.4' 
 'N'  'N'   0.0061   0.0033 
 'International Tables Vol C Tables 4.2.6.8 and 6.1.1.4' 
 'O'  'O'   0.0106   0.0060 
 'International Tables Vol C Tables 4.2.6.8 and 6.1.1.4' 
 
_symmetry_cell_setting            'orthorhombic' 
_symmetry_space_group_name_H-M    'P b c a' 
 
loop_ 
 _symmetry_equiv_pos_as_xyz 
 'x, y, z' 
 '-x+1/2, -y, z+1/2' 
 'x+1/2, -y+1/2, -z' 
 '-x, y+1/2, -z+1/2' 
 '-x, -y, -z' 
 'x-1/2, y, -z-1/2' 
 '-x-1/2, y-1/2, z' 
 'x, -y-1/2, z-1/2' 
 
_cell_length_a                    12.7109(7) 
_cell_length_b                    17.8216(10) 
_cell_length_c                    19.5965(11) 
_cell_angle_alpha                 90.00 
_cell_angle_beta                  90.00 
_cell_angle_gamma                 90.00 
_cell_volume                      4439.2(4) 
_cell_formula_units_Z             8 
_cell_measurement_temperature     293(2) 
_cell_measurement_reflns_used     ? 
_cell_measurement_theta_min       ? 
_cell_measurement_theta_max       ? 
 
_exptl_crystal_description        ? 
_exptl_crystal_colour             ? 
_exptl_crystal_size_max           0.6 
_exptl_crystal_size_mid           0.4
_exptl_crystal_size_min           0.3
_exptl_crystal_density_meas       ? 
_exptl_crystal_density_diffrn     1.180 
_exptl_crystal_density_method     'not measured' 
_exptl_crystal_F_000              1680 
_exptl_absorpt_coefficient_mu     0.081 
_exptl_absorpt_correction_type    'multi-scan'
_exptl_absorpt_correction_T_min   0.618
_exptl_absorpt_correction_T_max   0.999
_exptl_absorpt_process_details    'Bruker AXS SADABS (1999)'

 
_exptl_special_details 
; 
 ? 
;  
_diffrn_ambient_temperature       293(2) 
_diffrn_radiation_wavelength      0.71073 
_diffrn_radiation_type            MoK\a 
_diffrn_radiation_source          'fine-focus sealed tube' 
_diffrn_radiation_monochromator   graphite 
_diffrn_measurement_device_type   ? 
_diffrn_measurement_method        ? 
_diffrn_detector_area_resol_mean  ? 
_diffrn_standards_number          ? 
_diffrn_standards_interval_count  ? 
_diffrn_standards_interval_time   ? 
_diffrn_standards_decay_%         ? 
_diffrn_reflns_number             37759 
_diffrn_reflns_av_R_equivalents   0.0485 
_diffrn_reflns_av_sigmaI/netI     0.0357 
_diffrn_reflns_limit_h_min        -16 
_diffrn_reflns_limit_h_max        16 
_diffrn_reflns_limit_k_min        -22 
_diffrn_reflns_limit_k_max        23 
_diffrn_reflns_limit_l_min        -25 
_diffrn_reflns_limit_l_max        24 
_diffrn_reflns_theta_min          2.08 
_diffrn_reflns_theta_max          27.58 
_reflns_number_total              5126 
_reflns_number_gt                 2232 
_reflns_threshold_expression      >2sigma(I) 
 
_computing_data_collection        ? 
_computing_cell_refinement        ? 
_computing_data_reduction         ? 
_computing_structure_solution     'SHELXS-97 (Sheldrick, 1990)' 
_computing_structure_refinement   'SHELXL-97 (Sheldrick, 1997)' 
_computing_molecular_graphics     ? 
_computing_publication_material   ? 
 
_refine_special_details 
; 
 Refinement of F^2^ against ALL reflections.  The weighted R-factor wR and 
 goodness of fit S are based on F^2^, conventional R-factors R are based 
 on F, with F set to zero for negative F^2^. The threshold expression of 
 F^2^ > 2sigma(F^2^) is used only for calculating R-factors(gt) etc. and is 
 not relevant to the choice of reflections for refinement.  R-factors based 
 on F^2^ are statistically about twice as large as those based on F, and R- 
 factors based on ALL data will be even larger. 
; 
 
_refine_ls_structure_factor_coef  Fsqd  
_refine_ls_matrix_type            full 
_refine_ls_weighting_scheme       calc  
_refine_ls_weighting_details 
 'calc w=1/[\s^2^(Fo^2^)+(0.1226P)^2^+0.0000P] where P=(Fo^2^+2Fc^2^)/3' 
_atom_sites_solution_primary      direct 
_atom_sites_solution_secondary    difmap 
_atom_sites_solution_hydrogens    geom 
_refine_ls_hydrogen_treatment     mixed 
_refine_ls_extinction_method      none 
_refine_ls_extinction_coef        ? 
_refine_ls_number_reflns          5126 
_refine_ls_number_parameters      274 
_refine_ls_number_restraints      0 
_refine_ls_R_factor_all           0.1137 
_refine_ls_R_factor_gt            0.0510 
_refine_ls_wR_factor_ref          0.1872 
_refine_ls_wR_factor_gt           0.1518 
_refine_ls_goodness_of_fit_ref    0.822 
_refine_ls_restrained_S_all       0.822 
_refine_ls_shift/su_max           0.000 
_refine_ls_shift/su_mean          0.000 
 
loop_ 
 _atom_site_label 
 _atom_site_type_symbol 
 _atom_site_fract_x 
 _atom_site_fract_y 
 _atom_site_fract_z 
 _atom_site_U_iso_or_equiv 
 _atom_site_adp_type 
 _atom_site_occupancy 
 _atom_site_symmetry_multiplicity 
 _atom_site_calc_flag 
 _atom_site_refinement_flags 
 _atom_site_disorder_assembly 
 _atom_site_disorder_group 
C1 C 0.40884(15) -0.04831(13) 0.22156(10) 0.0663(5) Uani 1 1 d . . . 
C2 C 0.31520(16) -0.00695(14) 0.23990(12) 0.0802(7) Uani 1 1 d . . . 
H5 H 0.3151 0.0401 0.2605 0.096 Uiso 1 1 calc R . . 
C3 C 0.23069(15) -0.04472(14) 0.22360(10) 0.0730(6) Uani 1 1 d . . . 
H6 H 0.1624 -0.0284 0.2320 0.088 Uiso 1 1 calc R . . 
C4 C 0.25723(14) -0.11652(12) 0.19012(10) 0.0573(5) Uani 1 1 d . . . 
C5 C 0.21494(15) -0.12223(12) 0.11665(10) 0.0580(5) Uani 1 1 d . . . 
C6 C 0.09551(15) -0.12639(11) 0.11594(10) 0.0616(5) Uani 1 1 d . . . 
C7 C 0.04566(19) -0.18931(15) 0.13994(13) 0.0890(7) Uani 1 1 d . . . 
H001 H 0.0854 -0.2295 0.1558 0.107 Uiso 1 1 calc R . . 
C8 C -0.0642(3) -0.1938(2) 0.14094(16) 0.1193(11) Uani 1 1 d . . . 
H017 H -0.0970 -0.2367 0.1576 0.143 Uiso 1 1 calc R . . 
C9 C -0.1230(2) -0.1354(3) 0.11761(18) 0.1222(12) Uani 1 1 d . . . 
H020 H -0.1960 -0.1384 0.1182 0.147 Uiso 1 1 calc R . . 
C10 C -0.0753(2) -0.0732(2) 0.09356(15) 0.1060(9) Uani 1 1 d . . . 
H021 H -0.1156 -0.0334 0.0776 0.127 Uiso 1 1 calc R . . 
C11 C 0.03343(18) -0.06827(14) 0.09252(12) 0.0799(6) Uani 1 1 d . . . 
H008 H 0.0652 -0.0250 0.0757 0.096 Uiso 1 1 calc R . . 
C12 C 0.28082(15) -0.06583(13) 0.00919(11) 0.0696(6) Uani 1 1 d . . . 
C13 C 0.25129(18) -0.12573(16) -0.03073(12) 0.0861(7) Uani 1 1 d . . . 
H015 H 0.2114 -0.1646 -0.0124 0.103 Uiso 1 1 calc R . . 
C14 C 0.2827(3) -0.1273(2) -0.10060(15) 0.1114(10) Uani 1 1 d . . . 
H016 H 0.2639 -0.1674 -0.1285 0.134 Uiso 1 1 calc R . . 
C15 C 0.3408(3) -0.0695(2) -0.12594(15) 0.1102(10) Uani 1 1 d . . . 
H018 H 0.3629 -0.0715 -0.1711 0.132 Uiso 1 1 calc R . . 
C16 C 0.3675(2) -0.0090(2) -0.08775(16) 0.1058(10) Uani 1 1 d . . . 
H019 H 0.4048 0.0303 -0.1075 0.127 Uiso 1 1 calc R . . 
C17 C 0.33960(16) -0.00549(15) -0.01965(12) 0.0784(7) Uani 1 1 d . . . 
C18 C 0.4187(3) 0.11353(18) -0.0012(2) 0.1309(12) Uani 1 1 d . . . 
H20A H 0.4287 0.1492 0.0349 0.196 Uiso 1 1 calc R . . 
H20B H 0.3799 0.1365 -0.0377 0.196 Uiso 1 1 calc R . . 
H20C H 0.4860 0.0973 -0.0179 0.196 Uiso 1 1 calc R . . 
C19 C 0.43679(18) -0.17589(12) 0.17605(10) 0.0685(6) Uani 1 1 d . . . 
C20 C 0.4213(2) -0.30639(14) 0.13582(18) 0.1073(9) Uani 1 1 d . . . 
C21 C 0.4765(3) -0.29009(19) 0.06972(18) 0.1368(12) Uani 1 1 d . . . 
H13A H 0.4280 -0.2674 0.0384 0.205 Uiso 1 1 calc R . . 
H13B H 0.5028 -0.3360 0.0506 0.205 Uiso 1 1 calc R . . 
H13C H 0.5341 -0.2564 0.0779 0.205 Uiso 1 1 calc R . . 
C22 C 0.3224(3) -0.35231(18) 0.1261(3) 0.190(2) Uani 1 1 d . . . 
H11A H 0.2771 -0.3276 0.0940 0.284 Uiso 1 1 calc R . . 
H11B H 0.2867 -0.3573 0.1690 0.284 Uiso 1 1 calc R . . 
H11C H 0.3407 -0.4011 0.1091 0.284 Uiso 1 1 calc R . . 
C23 C 0.4936(3) -0.3415(2) 0.1881(2) 0.1628(17) Uani 1 1 d . . . 
H12A H 0.4553 -0.3505 0.2295 0.244 Uiso 1 1 calc R . . 
H12B H 0.5512 -0.3081 0.1972 0.244 Uiso 1 1 calc R . . 
H12C H 0.5203 -0.3881 0.1708 0.244 Uiso 1 1 calc R . . 
N1 N 0.37282(11) -0.11605(9) 0.19331(8) 0.0607(4) Uani 1 1 d . . . 
N2 N 0.25625(15) -0.06051(12) 0.07696(10) 0.0735(5) Uani 1 1 d . . . 
O1 O 0.49974(11) -0.03012(10) 0.22840(8) 0.0884(5) Uani 1 1 d . . . 
O2 O 0.53061(12) -0.17338(10) 0.17305(9) 0.0928(5) Uani 1 1 d . . . 
O3 O 0.37658(12) -0.23559(8) 0.16373(9) 0.0851(5) Uani 1 1 d . . . 
O4 O 0.36151(14) 0.05030(11) 0.02412(10) 0.1026(6) Uani 1 1 d . . . 
H1 H 0.2317(14) -0.1565(11) 0.2145(10) 0.060(5) Uiso 1 1 d . . . 
H2 H 0.2409(15) -0.1695(11) 0.0984(10) 0.067(6) Uiso 1 1 d . . . 
H3 H 0.2797(17) -0.0256(13) 0.0967(11) 0.076(8) Uiso 1 1 d . . . 
 
loop_ 
 _atom_site_aniso_label 
 _atom_site_aniso_U_11 
 _atom_site_aniso_U_22 
 _atom_site_aniso_U_33 
 _atom_site_aniso_U_23 
 _atom_site_aniso_U_13 
 _atom_site_aniso_U_12 
C1 0.0498(11) 0.0883(15) 0.0609(12) -0.0038(11) -0.0028(9) -0.0090(10) 
C2 0.0594(13) 0.0974(17) 0.0838(15) -0.0307(13) -0.0002(11) -0.0016(12) 
C3 0.0480(11) 0.1015(17) 0.0694(13) -0.0212(12) 0.0035(9) 0.0031(11) 
C4 0.0464(10) 0.0681(13) 0.0574(11) 0.0003(10) 0.0039(8) -0.0080(9) 
C5 0.0553(11) 0.0587(12) 0.0600(12) -0.0027(10) 0.0018(8) -0.0039(9) 
C6 0.0578(12) 0.0682(13) 0.0589(11) -0.0075(10) -0.0046(9) -0.0106(10) 
C7 0.0727(15) 0.0928(17) 0.1014(18) 0.0035(14) -0.0127(13) -0.0261(13) 
C8 0.083(2) 0.157(3) 0.118(2) -0.001(2) -0.0078(17) -0.058(2) 
C9 0.0613(17) 0.196(4) 0.109(2) -0.025(2) -0.0180(16) -0.017(2) 
C10 0.0716(19) 0.136(3) 0.110(2) -0.0225(18) -0.0234(15) 0.0167(18) 
C11 0.0706(15) 0.0844(16) 0.0846(15) -0.0102(12) -0.0146(11) 0.0038(12) 
C12 0.0511(11) 0.0936(16) 0.0640(13) 0.0083(12) -0.0002(9) 0.0127(11) 
C13 0.0817(16) 0.112(2) 0.0645(14) -0.0026(13) -0.0027(11) 0.0198(14) 
C14 0.114(2) 0.138(3) 0.0819(19) -0.0083(18) -0.0101(16) 0.044(2) 
C15 0.112(2) 0.145(3) 0.0736(18) 0.024(2) 0.0172(16) 0.043(2) 
C16 0.0867(18) 0.138(3) 0.092(2) 0.041(2) 0.0195(15) 0.0292(18) 
C17 0.0576(13) 0.1021(18) 0.0754(15) 0.0296(14) 0.0116(11) 0.0157(12) 
C18 0.101(2) 0.114(2) 0.177(3) 0.063(2) 0.0063(19) -0.0253(18) 
C19 0.0591(14) 0.0745(15) 0.0719(13) 0.0115(10) 0.0084(10) 0.0055(11) 
C20 0.110(2) 0.0622(15) 0.149(3) 0.0002(16) 0.0220(19) 0.0164(15) 
C21 0.181(3) 0.103(2) 0.126(3) -0.0234(19) 0.033(2) 0.016(2) 
C22 0.150(3) 0.072(2) 0.346(7) -0.046(3) 0.042(4) -0.018(2) 
C23 0.183(4) 0.115(3) 0.191(4) 0.054(3) 0.018(3) 0.067(3) 
N1 0.0441(8) 0.0710(10) 0.0670(10) -0.0025(8) 0.0025(7) -0.0009(8) 
N2 0.0797(13) 0.0787(13) 0.0621(11) 0.0005(10) 0.0051(9) -0.0204(10) 
O1 0.0518(9) 0.1175(14) 0.0959(11) -0.0105(9) -0.0058(7) -0.0182(8) 
O2 0.0576(10) 0.1037(13) 0.1172(13) 0.0016(10) 0.0107(8) 0.0119(8) 
O3 0.0761(10) 0.0632(9) 0.1160(13) 0.0071(8) 0.0128(9) 0.0071(8) 
O4 0.0971(13) 0.0992(13) 0.1115(14) 0.0229(11) 0.0080(10) -0.0219(10) 
 
_geom_special_details 
; 
 All esds (except the esd in the dihedral angle between two l.s. planes) 
 are estimated using the full covariance matrix.  The cell esds are taken 
 into account individually in the estimation of esds in distances, angles 
 and torsion angles; correlations between esds in cell parameters are only 
 used when they are defined by crystal symmetry.  An approximate (isotropic) 
 treatment of cell esds is used for estimating esds involving l.s. planes. 
; 
 
loop_ 
 _geom_bond_atom_site_label_1 
 _geom_bond_atom_site_label_2 
 _geom_bond_distance 
 _geom_bond_site_symmetry_2 
 _geom_bond_publ_flag 
C1 O1 1.207(2) . ? 
C1 N1 1.405(3) . ? 
C1 C2 1.445(3) . ? 
C2 C3 1.307(3) . ? 
C3 C4 1.477(3) . ? 
C4 N1 1.471(2) . ? 
C4 C5 1.540(3) . ? 
C5 N2 1.446(3) . ? 
C5 C6 1.520(3) . ? 
C6 C7 1.371(3) . ? 
C6 C11 1.381(3) . ? 
C7 C8 1.398(4) . ? 
C8 C9 1.360(5) . ? 
C9 C10 1.349(4) . ? 
C10 C11 1.384(3) . ? 
C12 N2 1.368(3) . ? 
C12 C13 1.376(3) . ? 
C12 C17 1.426(3) . ? 
C13 C14 1.427(4) . ? 
C14 C15 1.361(4) . ? 
C15 C16 1.355(4) . ? 
C16 C17 1.382(4) . ? 
C17 O4 1.342(3) . ? 
C18 O4 1.430(3) . ? 
C19 O2 1.195(2) . ? 
C19 O3 1.333(3) . ? 
C19 N1 1.383(3) . ? 
C20 O3 1.488(3) . ? 
C20 C23 1.512(5) . ? 
C20 C21 1.502(4) . ? 
C20 C22 1.512(4) . ? 
 
loop_ 
 _geom_angle_atom_site_label_1 
 _geom_angle_atom_site_label_2 
 _geom_angle_atom_site_label_3 
 _geom_angle 
 _geom_angle_site_symmetry_1 
 _geom_angle_site_symmetry_3 
 _geom_angle_publ_flag 
O1 C1 N1 125.9(2) . . ? 
O1 C1 C2 128.6(2) . . ? 
N1 C1 C2 105.54(16) . . ? 
C3 C2 C1 110.7(2) . . ? 
C2 C3 C4 111.53(18) . . ? 
N1 C4 C3 101.78(15) . . ? 
N1 C4 C5 112.88(15) . . ? 
C3 C4 C5 113.13(17) . . ? 
N2 C5 C6 113.26(17) . . ? 
N2 C5 C4 109.02(16) . . ? 
C6 C5 C4 111.12(15) . . ? 
C7 C6 C11 117.6(2) . . ? 
C7 C6 C5 119.9(2) . . ? 
C11 C6 C5 122.50(19) . . ? 
C6 C7 C8 120.9(3) . . ? 
C9 C8 C7 120.0(3) . . ? 
C10 C9 C8 119.9(3) . . ? 
C9 C10 C11 120.4(3) . . ? 
C6 C11 C10 121.2(2) . . ? 
N2 C12 C13 122.9(2) . . ? 
N2 C12 C17 116.9(2) . . ? 
C13 C12 C17 120.2(2) . . ? 
C12 C13 C14 119.0(3) . . ? 
C15 C14 C13 119.1(3) . . ? 
C16 C15 C14 122.4(3) . . ? 
C15 C16 C17 120.4(3) . . ? 
O4 C17 C16 126.7(3) . . ? 
O4 C17 C12 114.5(2) . . ? 
C16 C17 C12 118.8(3) . . ? 
O2 C19 O3 126.5(2) . . ? 
O2 C19 N1 124.7(2) . . ? 
O3 C19 N1 108.80(18) . . ? 
O3 C20 C23 109.5(3) . . ? 
O3 C20 C21 109.4(2) . . ? 
C23 C20 C21 112.4(3) . . ? 
O3 C20 C22 100.8(2) . . ? 
C23 C20 C22 111.5(3) . . ? 
C21 C20 C22 112.6(3) . . ? 
C19 N1 C1 124.57(17) . . ? 
C19 N1 C4 124.92(17) . . ? 
C1 N1 C4 110.33(16) . . ? 
C12 N2 C5 123.5(2) . . ? 
C19 O3 C20 121.61(18) . . ? 
C17 O4 C18 117.9(2) . . ? 
 
_diffrn_measured_fraction_theta_max    0.997 
_diffrn_reflns_theta_full              27.58 
_diffrn_measured_fraction_theta_full   0.997 
_refine_diff_density_max    0.274 
_refine_diff_density_min   -0.177 
_refine_diff_density_rms    0.034 
